# Supplementary material for: Preparation of lotus-like hierarchical microstructures on zinc substrate and study of its wettability
Source: Royal Society of Chemistry journal article supplement (doi:10.1039/c4ra04481a), 2014-01-01
Supplement: c4ra04481a1.pdf [file c4ra04481a1.pdf]

## Electronic Supporting Information

### Preparation of lotus-like hierarchical microstructures on zinc substrate and its wettability study

Huijie Wang<sup>a</sup>, Zhou Yang<sup>b</sup>, Jing Yu<sup>a</sup>, Yizhi Wu<sup>a</sup>, Weijia Shao<sup>a</sup>, Tongtong Jiang<sup>a</sup>,  
Xiaoliang Xu<sup>a,\*</sup>

<sup>a</sup>Department of Physics, University of Science and Technology of China, Hefei  
230026, PR China

<sup>b</sup>Dalian Institute of Chemical Physics, Chinese Academy of Science, Dalian,  
Liaoning 116023, PR China

\*Corresponding author

Department of Physics, University of Science and Technology of China, Hefei  
230026, PR China

E-mail address: [xlxu@ustc.edu.cn](mailto:xlxu@ustc.edu.cn) Tel: +86 551 63607574

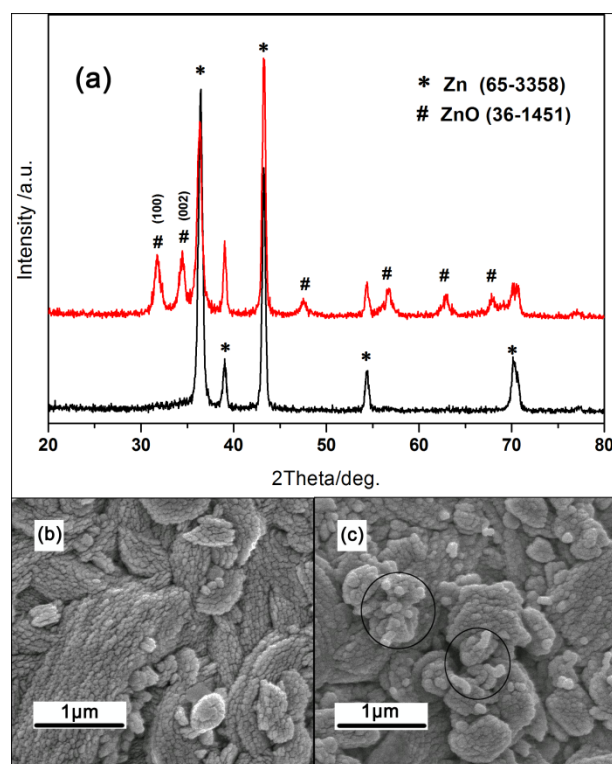

**Fig.S1** The XRD patterns and SEM image of sputtered Zn layer and Zn/ZnO

composite structure after water bath process. (a) XRD pattern for Zn film (black line) and Zn/ZnO film resulted from water bath (red line). (b) the microstructure of sputtered Zn film, and (c) the ZnO nanorods structure.

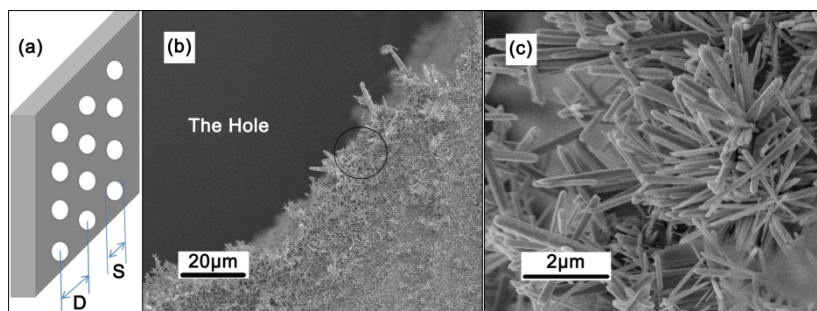

**Fig.S2** The Zn/ZnO morphology on the Zn drilled holes treated by acid etch and water bath. (a) The macro diagram, (b) the low magnification SEM image, and (c) the ZnO microstructure in a higher magnification.

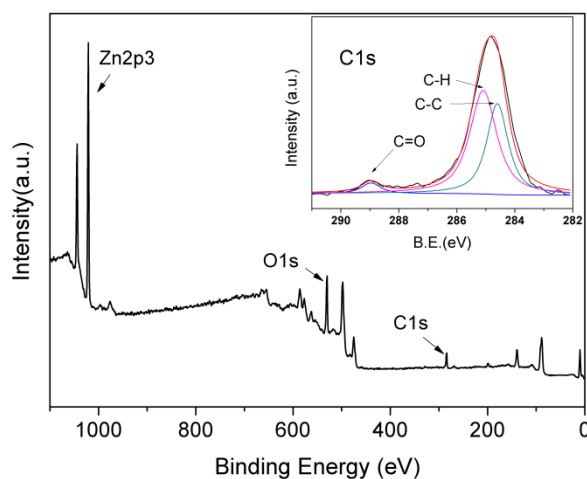

**Fig.S3** The XPS image for superhydrophobic sample after heating in 185°C atmosphere for 4 h. The inset is the splitting peaks of O1s peak.

**Movie S1** A video for superoleophilicity of the drilled Zn sheet with Zn/ZnO microstructure.

**Movie S2** A video for superhydrophobicity of the drilled Zn sheet with Zn/ZnO microstructure.

**Movie S3** A video for n-hexane/water separation experiment on the drilled Zn sheet with Zn/ZnO microstructure.
